# Supplementary material for: Endonasal CNS Delivery System for Blood-Brain Barrier Impermeant Therapeutic Oligonucleotides Using Heterotopic Mucosal Engrafting
Source: PubMed Central journal article supplement (PMC8090932; doi:10.3389/fphar.2021.660841), 2021-04-19
Supplement: datasheet1.pdf [file datasheet1.pdf]

*Supplementary Material*

1 **Supplementary Figures**

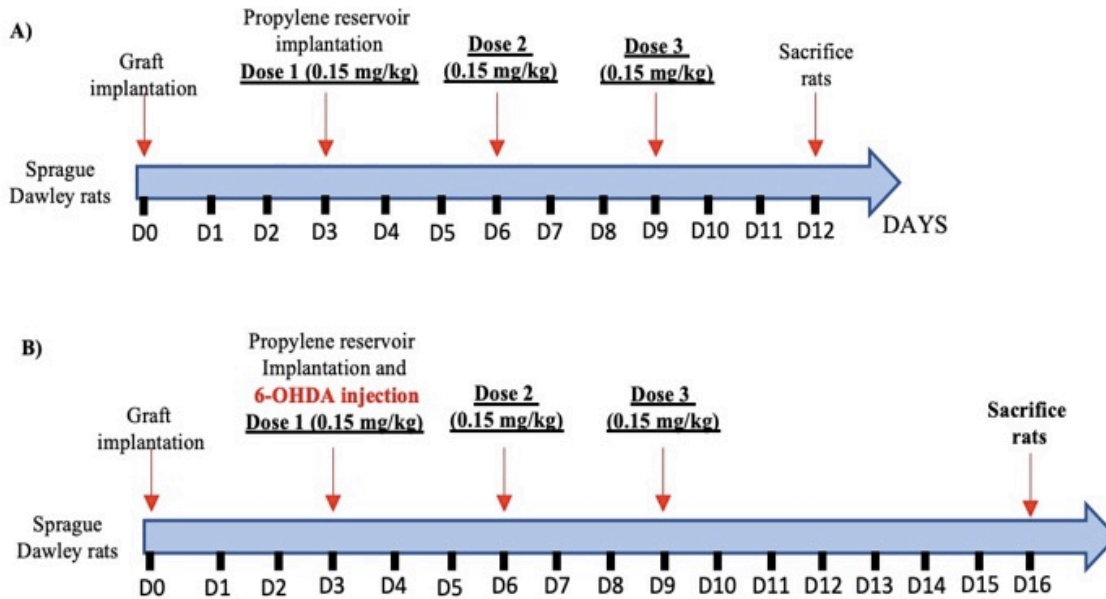

2

3 **Fig S1:** In vivo experimental timeline for A) Trans-nasal mucosal rat graft model and B) rat 6-  
 4 hydroxydopamine (6-OHDA) heterotopic mucosal graft model of Parkinson’s disease. Rats were dosed  
 5 with 0.15 mg/kg of either BDNF AT saline or liposomal formulations.

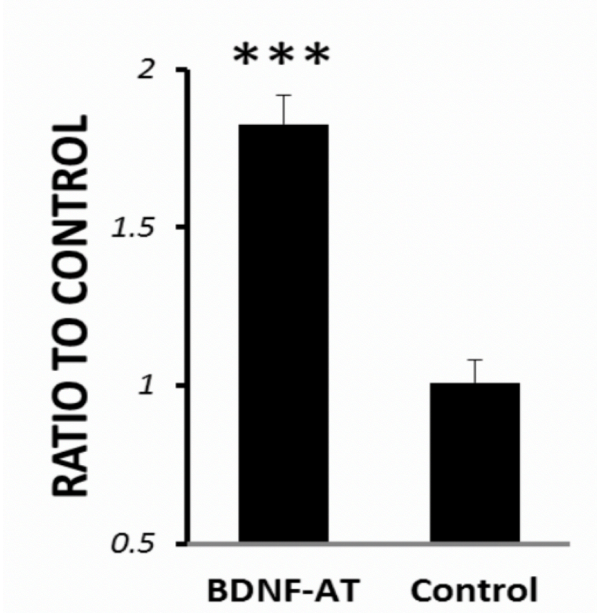

6

7 **Fig S2:** Upregulation of BDNF in rat schwannoma cell line RT4-D6P2T after treatment with 20 nM of  
 8 BDNF-AT compared to inactive control oligonucleotide (real time PCR data, n=6, \*\*\* - t-test  
 9 p<0.001).

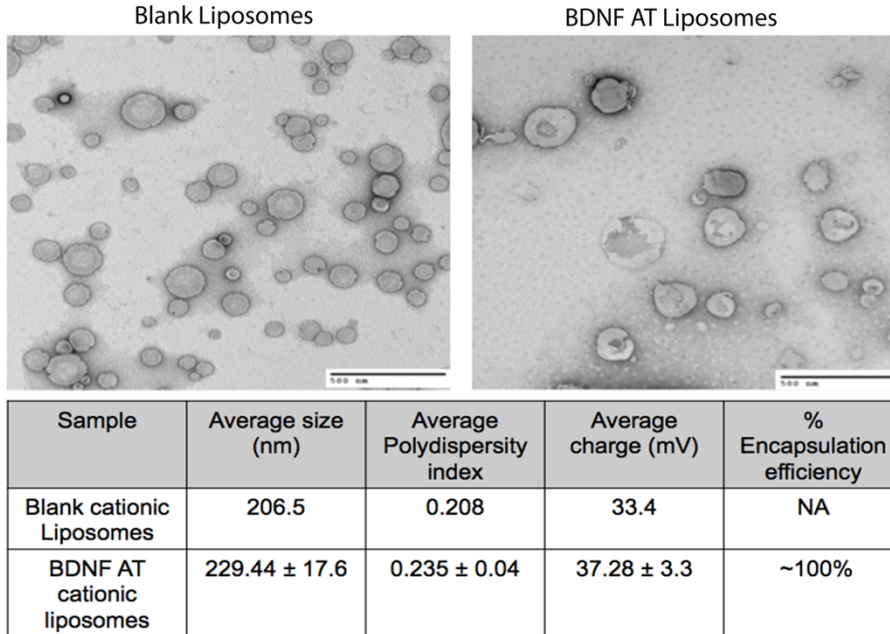

10  
 11 **Fig S3:** TEM (uranyl acetate) images and characterization data (average size, PDI and charge) for the  
 12 blank (no BDNF AT) (n=3) and BDNF-AT Liposomes (n=3).

13  
 14

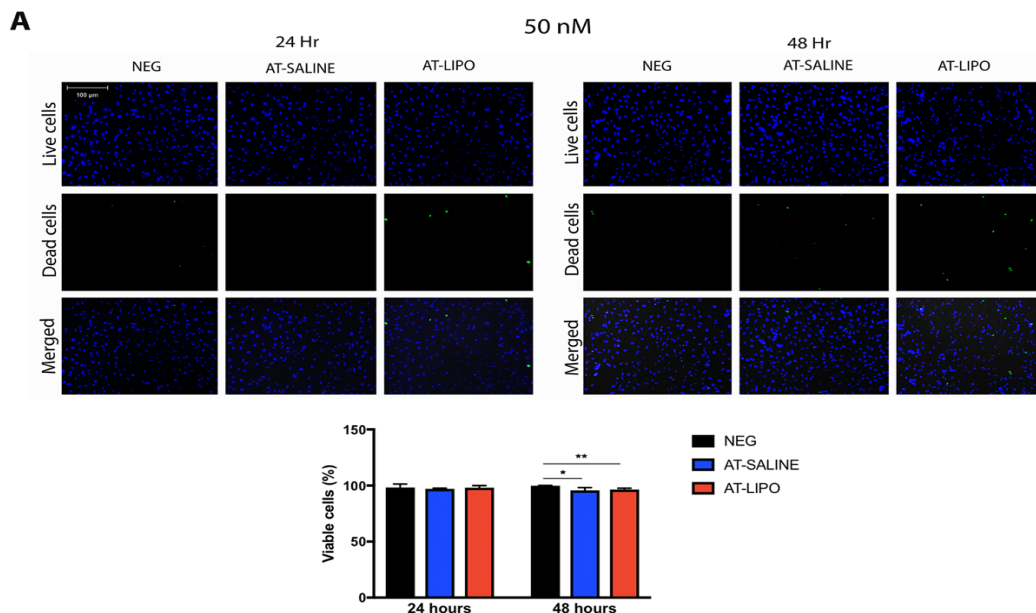

15

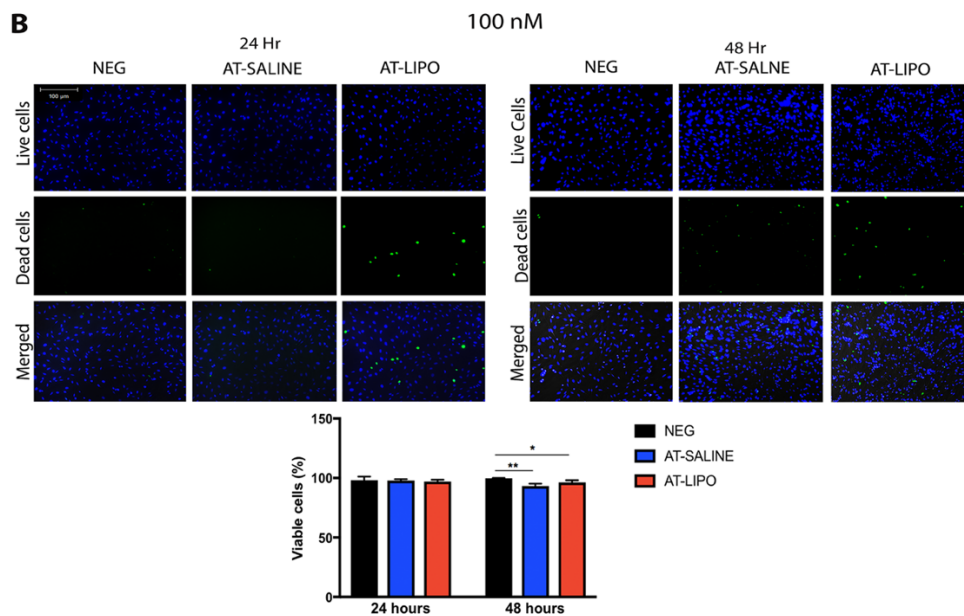

16

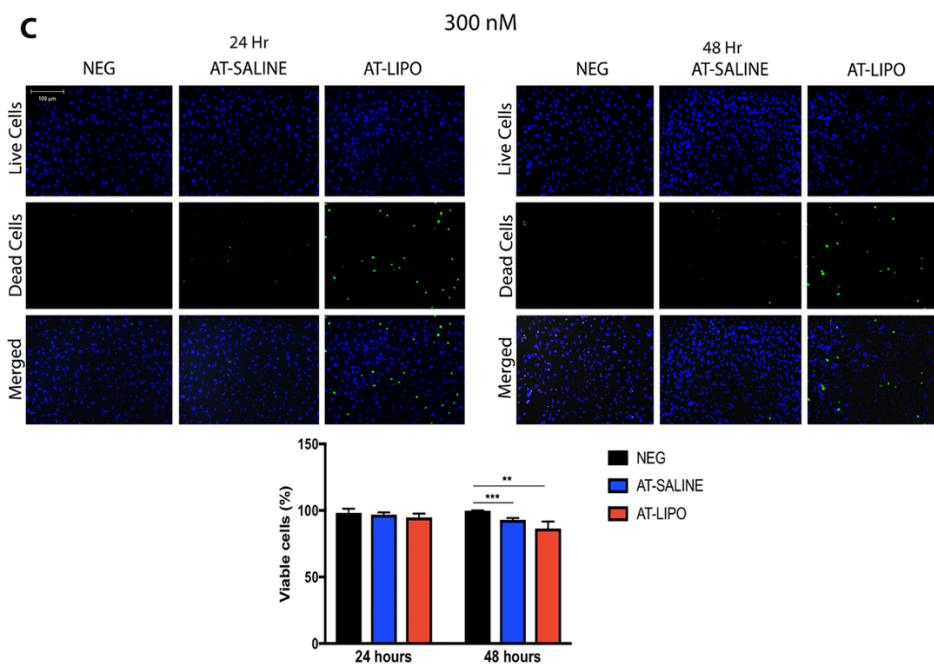

17

18 **Fig S4:** A-C. Live/dead assay in RT4-D6P2T rat schwannoma cells after exposure to 50-300nM of  
 19 vehicle control (NEG), liposome encapsulated BDNF-AT (AT-LIPO), and BDNF-AT in saline (AT-  
 20 SALINE) for 24-48 hours demonstrating greater than 80% viability at the doses and time-points  
 21 studied. (Data presented as mean  $\pm$  SD, Student's t-test).  
 22

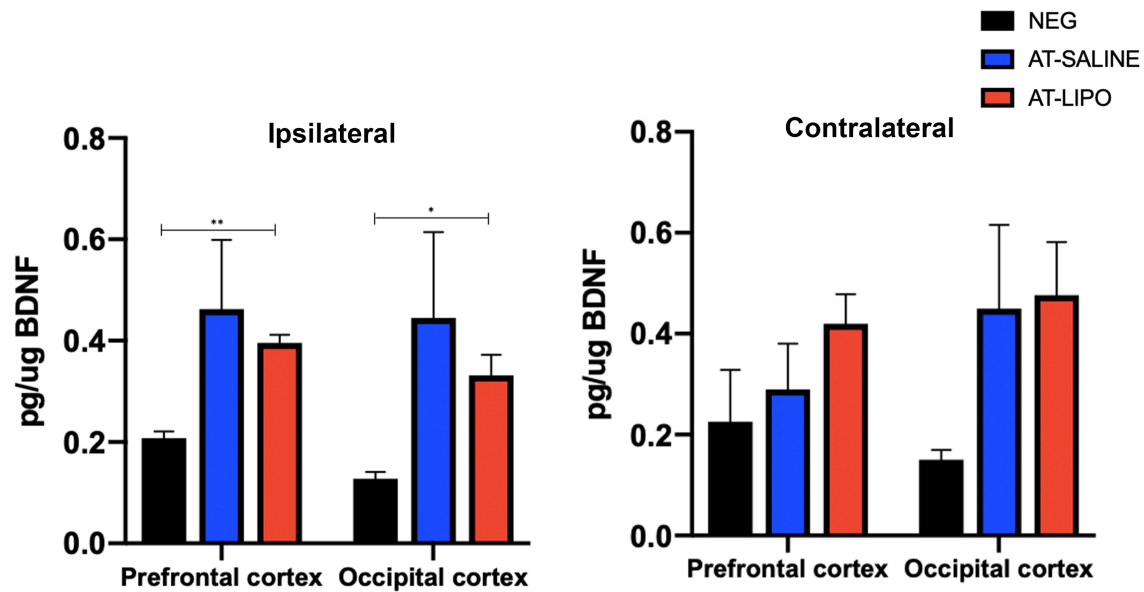

23  
24  
25  
26  
27

**Fig S5.** Bar graphs quantifying BDNF protein upregulation in ipsilateral and contralateral cortical regions of rat brain among the liposomal (AT-LIPO, n=4) and saline (AT-SALINE, n=4) groups as compared to negative control (NEG, \* p<0.05, \*\* p<0.01; two-tailed unpaired Student's t-test). Data are presented as mean  $\pm$  SD.
